# Supplementary material for: Incorporating Motif Analysis into Gene Co-expression Networks Reveals Novel Modular Expression Pattern and New Signaling Pathways
Source: PubMed Central journal article supplement (PMC3789834; doi:10.1371/journal.pgen.1003840), 2013-10-03
Supplement: pgen.1003840.s004.pdf [file pgen.1003840.s004.pdf]

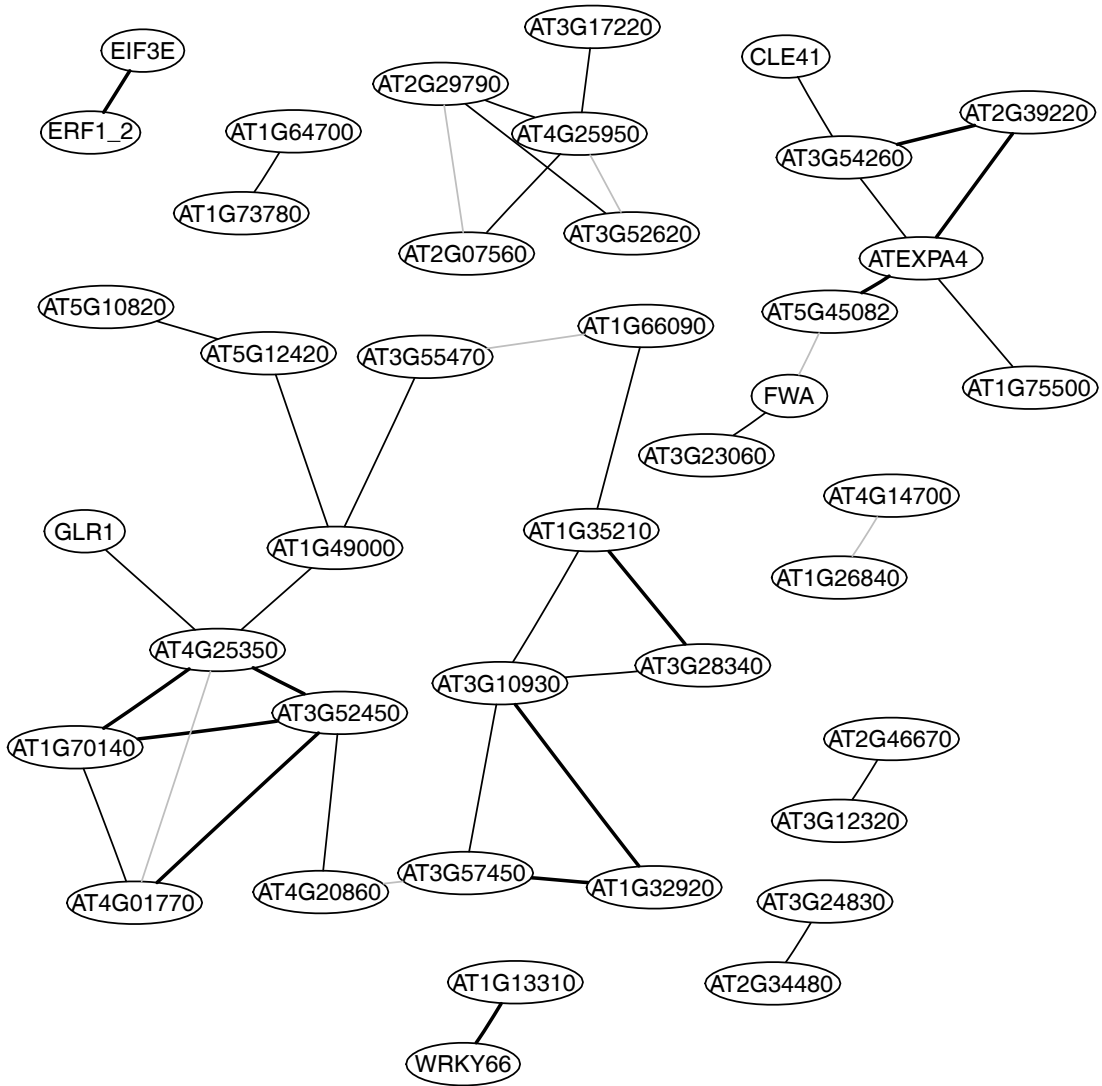

**Figure S4**  
**Ma et al.**
